# Supplementary material for: Plasmon-enabled N2 photofixation on partially reduced Ti3C2 MXene
Source: Royal Society of Chemistry journal article supplement (doi:10.1039/d1sc02772g), 2021-01-01
Supplement: d1sc02772g1.pdf [file d1sc02772g1.pdf]

## Electronic supplementary information

### Plasmon-enabled N<sub>2</sub> photofixation on partially reduced Ti<sub>3</sub>C<sub>2</sub> MXene

*Binbin Chang,<sup>a</sup> Yanzhen Guo,<sup>c</sup> Donghai Wu,<sup>c</sup> Li Li,<sup>\*a</sup> Jianfang Wang<sup>\*b</sup> and Baocheng Yang<sup>\*c</sup>*

<sup>a</sup>Shanghai Key Laboratory of Green Chemistry and Chemical Processes, School of Chemistry and Molecular Engineering, East China Normal University, Shanghai 200241, China

<sup>b</sup>Department of Physics, The Chinese University of Hong Kong, Shatin, Hong Kong SAR, China

<sup>c</sup>Henan Provincial Key Laboratory of Nanocomposites and Applications, Institute of Nanostructured Functional Materials, Huanghe Science and Technology College, Zhengzhou 450006, China

### Experimental

#### Preparation of the layered Ti<sub>3</sub>C<sub>2</sub> MXene and partially reduced layered Ti<sub>3</sub>C<sub>2</sub> MXene

The synthesis of the layered Ti<sub>3</sub>C<sub>2</sub> was conducted according to the reported method.<sup>1</sup> Typically, 1 g of the prepared Ti<sub>3</sub>AlC<sub>2</sub> powder (200 mesh) was dispersed in 10 mL of 40 wt% HF acid under magnetic stirring at 35 °C for 24 h. The resultant suspension was washed with deionized water by centrifugation until the pH value became near 7. The obtained wet Ti<sub>3</sub>C<sub>2</sub> powder was dried in a vacuum oven at 60 °C overnight. To reduce Ti<sub>3</sub>C<sub>2</sub>, 0.5 g of the as-obtained dry Ti<sub>3</sub>C<sub>2</sub> powder was heat-treated at 200 °C in a H<sub>2</sub> atmosphere (5 vol% in N<sub>2</sub>) for 6 h to prepare the partially reduced layered Ti<sub>3</sub>C<sub>2</sub> MXene, which was denoted as r-Ti<sub>3</sub>C<sub>2</sub>.

#### Preparation of the Au nanospheres

The citrate-capped Au nanospheres were prepared according to a previously reported method with slight modifications.<sup>2</sup> Typically, 50 mL of HAuCl<sub>4</sub> solution (0.25 mM) was added in a 100-mL round-bottom flask. The solution was brought to boiling under stirring. 2.0 mL of sodium citrate solution (1 wt%) was then added. The reaction mixture was kept at the boiling

temperature under stirring for 30 min. The solution finally became wine red, suggesting the production of Au nanospheres. Through the variation of the sodium citrate amount in the solution, Au nanospheres with different sizes were synthesized. Specifically, 1.15, 1.0 and 2.0 mL of the sodium citrate solution gave Au nanospheres of 13, 16 and 19 nm in diameter, respectively.

The Au nanospheres coated with cetyltrimethylammonium bromide (CTAB) were prepared in aqueous solutions according to a previously reported seed-mediated growth method with slight modifications.<sup>3</sup> Briefly, for the preparation of the seed solution, 0.25 mL of HAuCl<sub>4</sub> solution (0.01 M) was added into 9.75 mL of CTAB solution (0.1 M), followed by the rapid injection of a freshly prepared, ice-cold NaBH<sub>4</sub> solution (0.01 M, 0.6 mL) under vigorous stirring. The resultant solution was placed in an oven at 30 °C and kept undisturbed for 4 h. 0.25 mL of the seed solution was rapidly injected into a growth solution composed of CTAB (0.1 M, 9.75 mL), water (190 mL), HAuCl<sub>4</sub> (0.01 M, 4 mL), and ascorbic acid (0.1 M, 15 mL). The reaction mixture was gently shaken for 30 s and then left undisturbed overnight at 30 °C. The resultant Au nanospheres were centrifuged and washed twice with water and finally re-dispersed into water for further use.

### **Synthesis of r-Ti<sub>3</sub>C<sub>2</sub>/Au and Ti<sub>3</sub>C<sub>2</sub>/Au**

The sandwich-like r-Ti<sub>3</sub>C<sub>2</sub>/Au nanostructures were prepared by a simple solvent-driven method. Briefly, to drive the citrate-capped Au nanospheres into the interlayer space of the layered r-Ti<sub>3</sub>C<sub>2</sub>, 0.1 g of the r-Ti<sub>3</sub>C<sub>2</sub> powder and 10 mL of water were mixed and sonicated for 20 min under flowing Ar. A pre-calculated volume of the citrate-capped Au nanosphere solution was then added. After the mixture was continuously sonicated for 10 min, H<sub>2</sub>O was removed by rotary evaporation at 45 °C. The obtained powder was further dried in a vacuum oven at 60 °C for 6 h to get the final product, which was denoted as r-Ti<sub>3</sub>C<sub>2</sub>/Au. The Ti<sub>3</sub>C<sub>2</sub>/Au sample was prepared following the same procedure.

In addition, the r-Ti<sub>3</sub>C<sub>2</sub>/edge-Au sample was obtained by replacing the citrate-capped Au nanospheres with the CTAB-capped ones in the above procedure.

### **Characterization**

X-ray diffraction (XRD) patterns were recorded on a Bruker D8 diffractometer using Cu K $\alpha$  radiation ( $\lambda = 0.15418$  nm) as the X-ray source. The scanning electron microscopy (SEM) images were acquired on an FEI Quanta 250 FEG microscope. Transmission electron microscopy (TEM) imaging was performed on an FEI Tecnai G2 20 microscope operated at 200 kV. The diffuse-reflectance absorption spectra were measured on a Japan U-4100 ultraviolet/visible/near-infrared spectrophotometer equipped with an integrating sphere accessory using BaSO<sub>4</sub> as the reference. The extinction spectra of the Au nanospheres and the absorption spectra for the determination of NH<sub>3</sub> were measured on the same spectrophotometer. The X-ray photoelectron spectroscopy (XPS) measurements were performed on an Escalab 250 Xi system (Thermo Fisher Scientific) with Al K $\alpha$  as the X-ray source for excitation. The low-temperature electron paramagnetic resonance (EPR) spectra were acquired on a Bruker E500 EPR spectrometer at 77 K. N<sub>2</sub> temperature-programmed desorption (TPD) analysis was performed in a quartz reactor using a thermal conductivity detector. *In situ* diffuse-reflectance infrared Fourier transform spectroscopy (DRIFTS) was conducted on a Nicolet iS50 FT-IR spectrometer with a home-designed reaction cell. The Au atomic ratios in the catalyst samples were determined by inductively coupled plasma mass spectrometry (ICP-MS, Thermo Fisher). <sup>1</sup>H NMR spectra were measured on a Bruker Avance III spectrometer.

### **Nitrogen photofixation reaction**

The N<sub>2</sub> photofixation reactions were carried out in a 100-mL quartz reactor with an opening of 5.6 cm in diameter under N<sub>2</sub> atmosphere at room temperature. In a typical reaction, 80 mg of the photocatalyst and 50 mL of water were added into the reactor. The mixture solution was sonicated for 10 min to achieve uniform dispersion and then bubbled with ultrapure N<sub>2</sub> at a flow rate of 100 mL min<sup>-1</sup> for 30 min to remove dissolved air. The reactor was subsequently illuminated with a 300-W Xe lamp (PLS-SXE300C, Beijing Perfectlight Technology) and bubbled with N<sub>2</sub> at a flow rate of 50 mL min<sup>-1</sup> under continuous stirring. An aliquot of the reaction solution (3.0 mL) was taken out at regular intervals using a syringe. The collected aliquots were centrifuged to remove the photocatalyst. The concentrations of NH<sub>3</sub> in the supernatant at different illumination durations were determined by Nessler's method. Typically, the supernatant solution (0.5 mL) was first diluted with H<sub>2</sub>O (2 mL), followed by the addition of potassium sodium tartrate (0.2 M, 0.25 mL) and Nessler's reagent (0.09 M K<sub>2</sub>HgI<sub>4</sub> in a 2.5 M

KOH aqueous solution, 0.25 mL). The solution was mixed thoroughly and left for 20 min. The produced  $\text{NH}_3$  can react with iodide and mercury ions under alkaline conditions according to the reaction below<sup>4</sup>

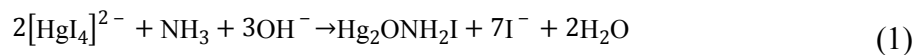

The  $\text{NH}_4^+$  concentration was calculated by measuring the absorbance at 420 nm according to a pre-established calibration curve on an ultraviolet/visible/near-infrared spectrophotometer. Each photocatalytic  $\text{N}_2$  fixation experiment, including the control experiments, was repeated three times under the same conditions. The average amount of the produced  $\text{NH}_4^+$  and the standard deviation were calculated.

### **$^{15}\text{N}_2$ isotope labelling experiment**

The  $^{15}\text{N}_2$  isotope labelling experiments were performed to further verify the origin of the produced  $\text{NH}_3$ . In a typical experiment, 50 mL of water and 80 mg of the photocatalyst were added in the reactor. The reactor was sealed when  $^{15}\text{N}_2$  was used as the feed gas. Before the supply of  $^{15}\text{N}_2$ , the reaction system was sequentially vacuumed, blown with Ar, and vacuumed again. The remaining illumination steps were the same as in the above regular photocatalytic reactions. After the reaction was completed, the reaction solution was collected and acidified to  $\text{pH} = 2.0$  with HCl. Dimethyl sulfoxide- $d_6$  (DMSO- $d_6$ , 0.3 mL) was then added to the solution (0.2 mL) for  $^1\text{H}$  NMR measurements.

### **Apparent quantum efficiency measurements**

For the measurement of the apparent quantum efficiencies (AQEs), the  $\text{N}_2$  photofixation reactions were performed under monochromatic light using appropriate bandpass filters at different wavelengths (380, 420, 450, 475, 500, 520, 550, 578, 600, 650 and 700 nm, full widths at half maximum for all: 20 nm, Beijing MerryChange Technology). The corresponding power intensities were measured using an optical power meter (Molelectron POWER MAX 5200). The AQEs under different monochromatic light were calculated according to the following equation

$$AQE (\%) = \frac{N_{\text{reacted}}}{N_{\text{incident}}} \times 100\% = \frac{3N_{\text{NH}_3}}{N_{\text{incident}}} \times 100\% = \frac{3n_{\text{NH}_3} \times N_A}{(W \times A \times t)/(h\nu)} \times 100\% \quad (2)$$

where  $N_{\text{reacted}}$ ,  $N_{\text{incident}}$  and  $N_{\text{NH}_3}$  represent the numbers of the reacted electrons, the incident photons and the generated  $\text{NH}_3$  molecules, respectively,  $W$ ,  $A$  and  $t$  respectively denote the light

intensity, illumination area and illumination time,  $\nu$  is the light frequency,  $h$  is Planck's constant, and  $N_A$  is Avogadro's constant.

### Solar-to-ammonia conversion efficiency measurements

To determine the solar-to-ammonia conversion efficiency (SACE), the photocatalytic  $N_2$  fixation reactions were carried out in a sealed reactor under simulated AM1.5G light illumination. Typically, 200 mg of the photocatalyst and 50 mL of water were added into the reactor. The reaction system was vacuumed and blown with  $N_2$  repeatedly several times to drive out the dissolved air completely and then sealed with a rubber plug. To make sure that the reaction system was filled with  $N_2$ , it was further bubbled for another 1 h with a  $N_2$ -filled balloon. After the reaction solution was subjected under the simulated AM1.5G light illumination for 1 h, the produced ammonia amount was determined using Nessler's method. In addition, the evolved gases were also measured on a gas chromatograph (CEAULIGHT GC-7900, TCD detector, Ar carrier gas). The photocatalytic reaction was repeated three times.

The SACE was calculated based on the equation below

$$\text{SACE} = \frac{[\Delta G^0 \text{ for } NH_3 \text{ generation } (J \text{ mol}^{-1})] \times [\text{evolved } NH_3 \text{ (mol)}]}{[\text{total input light power (W)}] \times [\text{reaction time (s)}]}$$

(3)

In the above equation, the  $\Delta G^0$  value for  $NH_3$  generation is 339 kJ mol<sup>-1</sup>. The overall illumination intensity of the AM1.5G light source was 100 mW cm<sup>-2</sup> and the illumination area was 24.62 cm<sup>2</sup>.

### Electrochemical measurements

To prepare the working electrode, the catalyst was first dispersed in an ethanolic solution of Nafion (5.0 vol%) to form an ink (10 mg mL<sup>-1</sup>). The resultant dispersion (0.2 mL) was then dip-coated onto an indium tin oxide (ITO)-coated glass electrode with a coated area of 1 cm<sup>2</sup> and allowed to dry in a vacuum oven overnight at room temperature. The photocurrent and electrochemical impedance spectroscopy (EIS) measurements were conducted on an electrochemical workstation (CHI 760E, Shanghai Chenhua) in a three-electrode system with an electrolyte solution of 0.5 M Na<sub>2</sub>SO<sub>4</sub>, using Pt foil as the counter electrode, the standard Ag/AgCl electrode as the reference electrode, and the ITO substrate as the working electrode.

### Density functional theory calculations

All density functional theory (DFT) calculations were carried out using Vienna *Ab Initio* Simulation Package (VASP). The Perdew-Burke-Ernzerhof (PBE) functional within the generalized gradient approximation (GGA) was selected as the exchange correlation functional. The dispersion-corrected DFT-D3 scheme was employed to account for the van der Waals interaction.<sup>5</sup> The projector augmented wave potential was used with a plane-wave cutoff energy of 500 eV. All atoms were fully relaxed until the force on each atom was less than 0.01 eV Å<sup>-1</sup> and the convergence criterion of the total energy was set to be 10<sup>-5</sup> eV. The Brillouin zone was sampled with a 3 × 3 × 1 Monkhorst–Pack mesh. A vacuum spacing of 15 Å was set to avoid the interaction between two neighboring images.

The adsorption energy ( $E_{\text{ads}}$ ) of a N<sub>2</sub> molecule on the Ti<sub>3</sub>C<sub>2</sub>O<sub>2</sub> slab surface was calculated according to the formula

$$E_{\text{ads}} = E_{\text{slab} + \text{N}_2} - E_{\text{slab}} - E_{\text{N}_2} \quad (4)$$

where  $E_{\text{slab} + \text{N}_2}$  and  $E_{\text{slab}}$  are the total energy of the Ti<sub>3</sub>C<sub>2</sub>O<sub>2</sub> supercell with and without an adsorbed N<sub>2</sub> molecule, and  $E_{\text{N}_2}$  is the total energy of a free N<sub>2</sub> gas molecule. Under this definition, a negative adsorption energy indicates that the N<sub>2</sub> molecule can be adsorbed on the Ti<sub>3</sub>C<sub>2</sub>O<sub>2</sub> surface stably. A more negative  $E_{\text{ads}}$  signifies the stronger adsorption of the N<sub>2</sub> molecule.

A 5 × 5 × 1 Ti<sub>3</sub>C<sub>2</sub>O<sub>2</sub> supercell was built to study the adsorption property of N<sub>2</sub>. In addition, Ti atoms with different O coordination environment were set to simulate the chemical activity of the different valance states of Ti<sup>(4-x)+</sup>. Specifically, some O atoms on one side of the Ti<sub>3</sub>C<sub>2</sub>O<sub>2</sub> layer were removed, leaving the underlying Ti atoms exposed. The exposed Ti atoms were bonded with O atoms in different numbers. As shown in Figure 6f,g, the Ti1 site represents a Ti atom without bonding to any O atoms, the Ti2 site denotes a Ti atom bonding to only one O atom, the Ti3 and Ti4 sites refer to Ti atoms bonding to two and three O atoms, respectively. In order to find the optimal configuration of N<sub>2</sub> on the Ti<sub>3</sub>C<sub>2</sub>O<sub>2</sub> surface, a number of possible positions and orientations were considered. During the searching process, a free N<sub>2</sub> molecule was initially placed on the surface randomly. Such placement can provide sufficient initial guess for the most stable adsorbed configuration. Due to the attractive force between the adsorbent and the

adsorbate, the  $\text{N}_2$  molecule would be adsorbed onto the surface of  $\text{Ti}_3\text{C}_2\text{O}_2$  after structural relaxation.

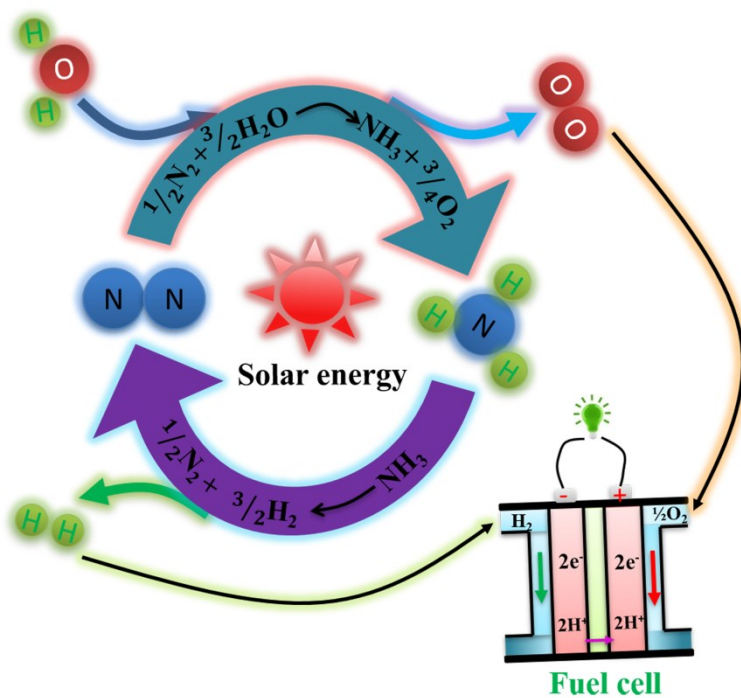

**Fig. S1** Schematic illustrating the  $\text{N}_2/\text{NH}_3$  cycle.

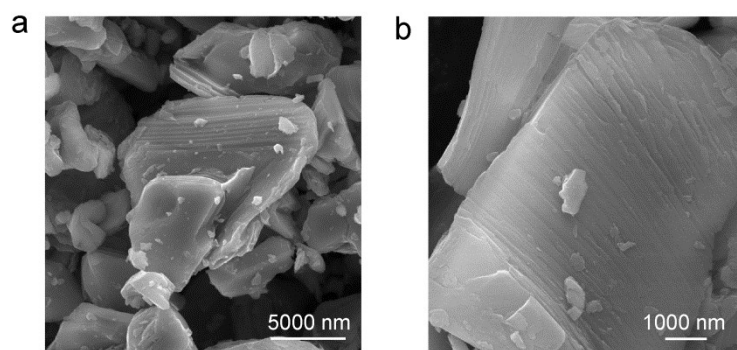

**Fig. S2** SEM images of  $\text{Ti}_3\text{AlC}_2$ . (a) Low magnification. (b) High magnification.

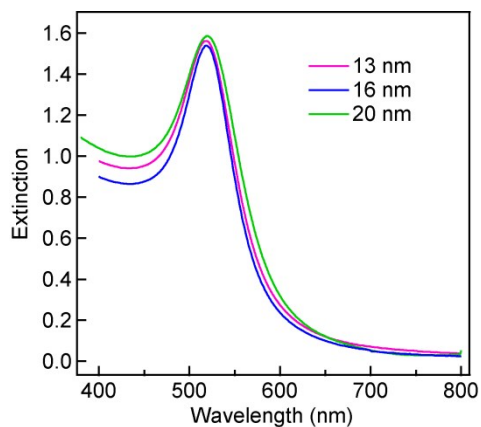

**Fig. S3** Extinction spectra of the differently sized Au nanospheres in water.

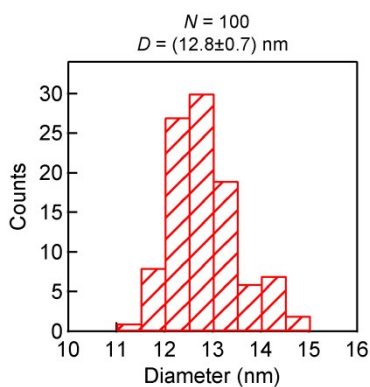

**Fig. S4** Histogram of the size distribution of the 13 nm Au nanospheres.

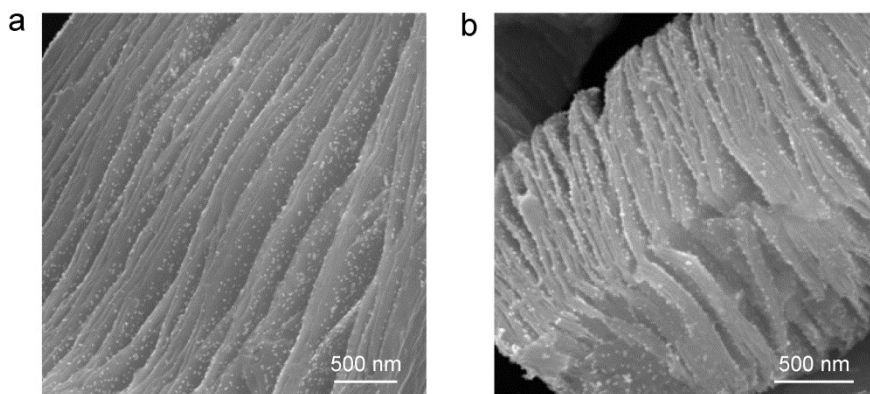

**Fig. S5** Low-magnification SEM images. (a)  $\text{Ti}_3\text{C}_2/\text{Au}$ . (b)  $\text{r-Ti}_3\text{C}_2/\text{Au}$ .

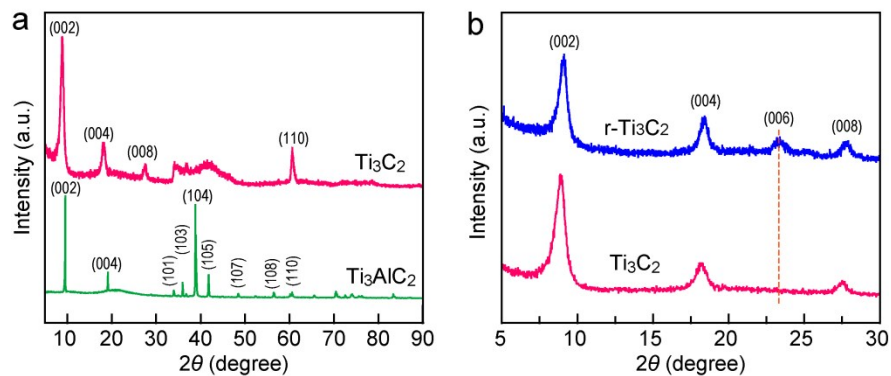

**Fig. S6** XRD characterization. (a) Patterns of the  $\text{Ti}_3\text{AlC}_2$  and  $\text{Ti}_3\text{C}_2$  samples. (b) Magnified patterns in the region of  $2\theta = 5\text{--}30^\circ$ .

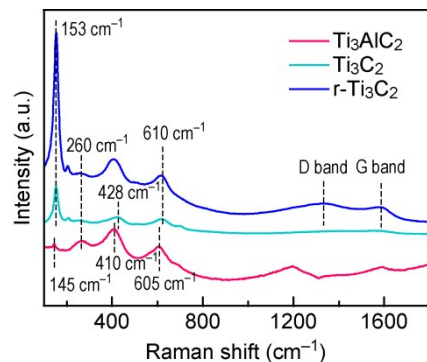

**Fig. S7** Raman spectra of  $\text{Ti}_3\text{AlC}_2$ ,  $\text{Ti}_3\text{C}_2$  and  $\text{r-Ti}_3\text{C}_2$ .

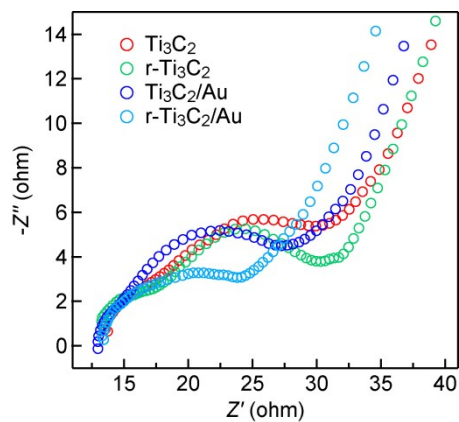

**Fig. S8** Nyquist plots of  $\text{Ti}_3\text{C}_2$ ,  $\text{r-Ti}_3\text{C}_2$ ,  $\text{Ti}_3\text{C}_2/\text{Au}$  and  $\text{r-Ti}_3\text{C}_2/\text{Au}$  in  $\text{N}_2$  under white light illumination.

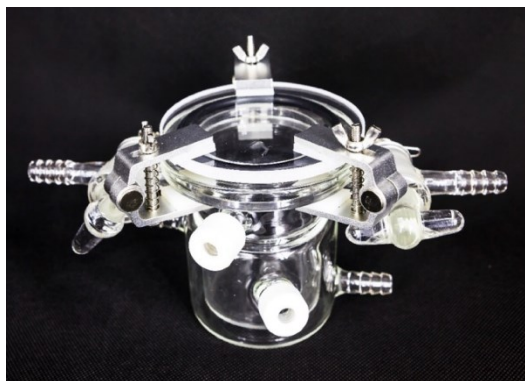

**Fig. S9** Photograph of the photocatalytic  $N_2$  fixation reactor.

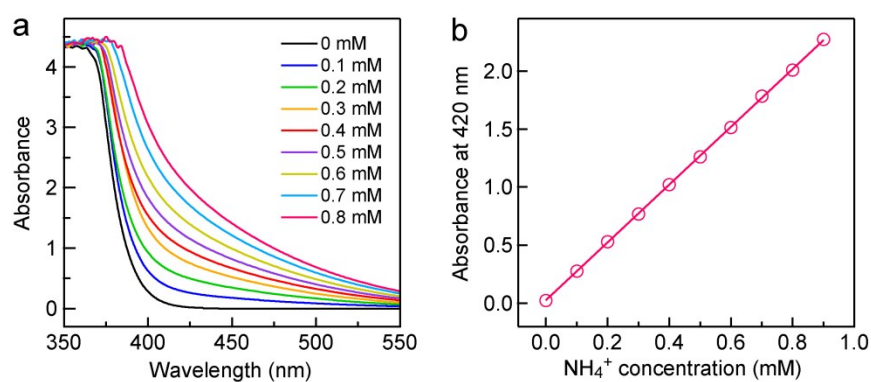

**Fig. S10** Dependence of the absorbance on the  $NH_4^+$  determination. (a) Absorption spectra of the standard  $NH_4^+$  solutions at different concentrations. (b) Linear relationship between the absorbance at 420 nm and the  $NH_4^+$  concentration ( $y = 0.026x + 2.4887$ ,  $R^2 = 0.9999$ ).

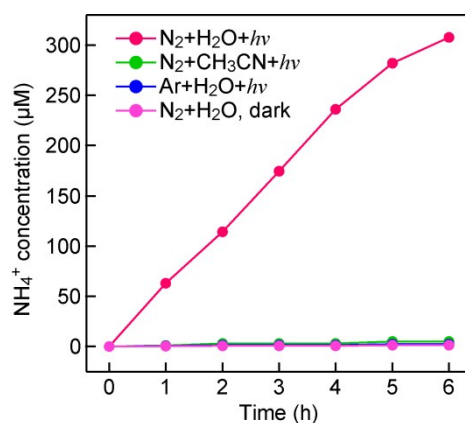

**Fig. S11** Control experiments on the photocatalytic  $N_2$  fixation with  $r-Ti_3C_2/Au$  under different reaction conditions and white light illumination.

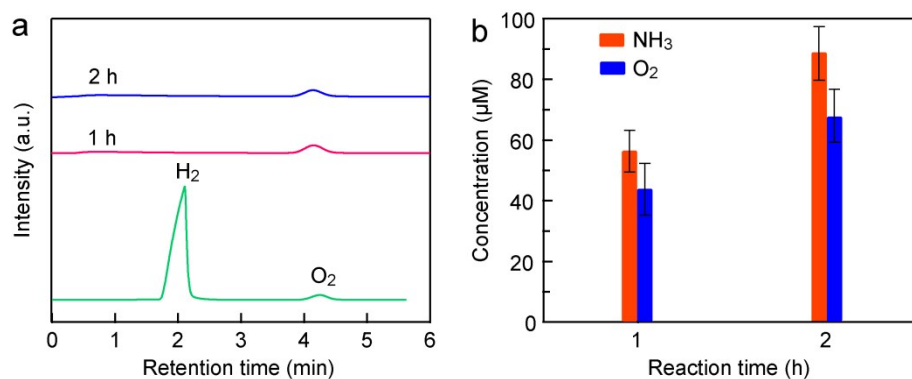

**Fig. S12** Analysis of the products of the photocatalytic N<sub>2</sub> fixation reaction with r-Ti<sub>3</sub>C<sub>2</sub>/Au. (a) Gas chromatograph of the photocatalytic N<sub>2</sub> fixation reaction solution under white light illumination for 1 and 2 h in a sealed system. The green line shows the H<sub>2</sub> and O<sub>2</sub> standards. (b) Amounts of NH<sub>3</sub> and O<sub>2</sub> after the reaction for 1 and 2 h in a sealed system.

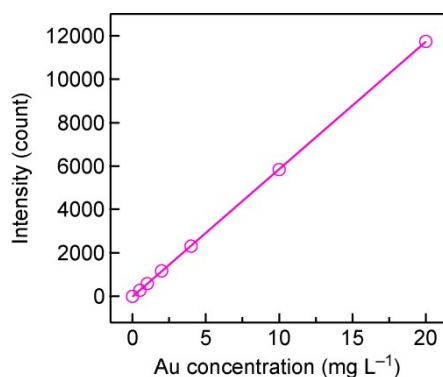

**Fig. S13** Linear relationship between the intensity and the standard Au concentration ( $y = 587.09x - 13.32$ ,  $R^2 = 0.9999$ ).

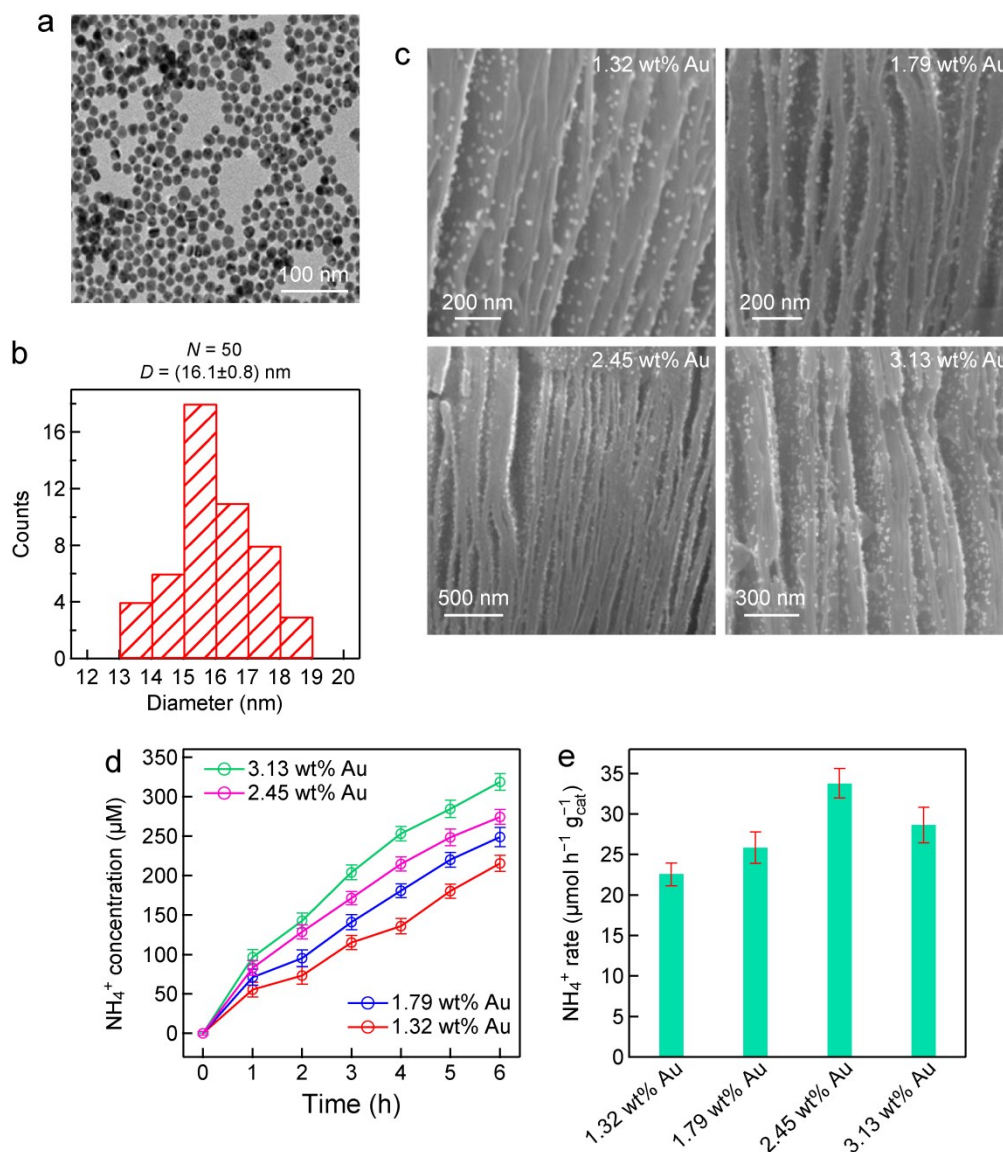

**Fig. S14** Characterization and N<sub>2</sub> photofixation activity of the r-Ti<sub>3</sub>C<sub>2</sub>/Au samples containing the 16-nm Au nanospheres. (a) TEM image of the Au nanospheres. (b) Histogram of the diameter distribution of the Au nanospheres. (c) SEM images of the r-Ti<sub>3</sub>C<sub>2</sub>/Au samples with the loaded Au amounts indicated in the images. (d) Time courses of the NH<sub>3</sub> concentrations over the r-Ti<sub>3</sub>C<sub>2</sub>/Au samples with the different Au amounts under white light. (e) NH<sub>3</sub> production rates over the r-Ti<sub>3</sub>C<sub>2</sub>/Au samples with the different Au amounts under white light.

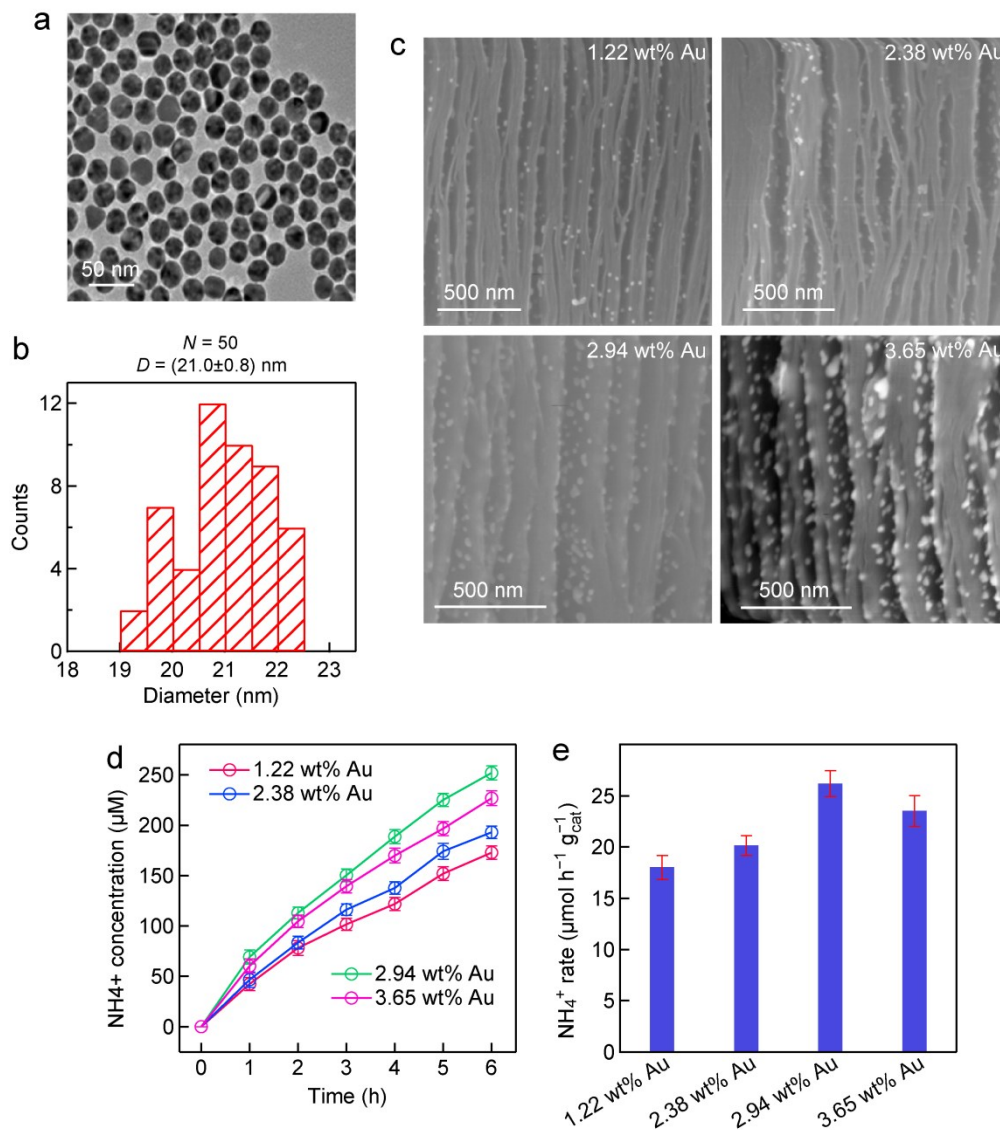

**Fig. S15** Characterization and N<sub>2</sub> photofixation activity of the r-Ti<sub>3</sub>C<sub>2</sub>/Au samples containing the 20-nm Au nanospheres. (a) TEM image of the Au nanospheres. (b) Histogram of the diameter distribution of the Au nanospheres. (c) SEM images of the r-Ti<sub>3</sub>C<sub>2</sub>/Au samples with the loaded Au amounts indicated in the images. (d) Time courses of the ammonia concentrations over the r-Ti<sub>3</sub>C<sub>2</sub>/Au samples with the different Au amounts under white light. (e) NH<sub>3</sub> production rates over the r-Ti<sub>3</sub>C<sub>2</sub>/Au samples with the different Au amounts under white light.

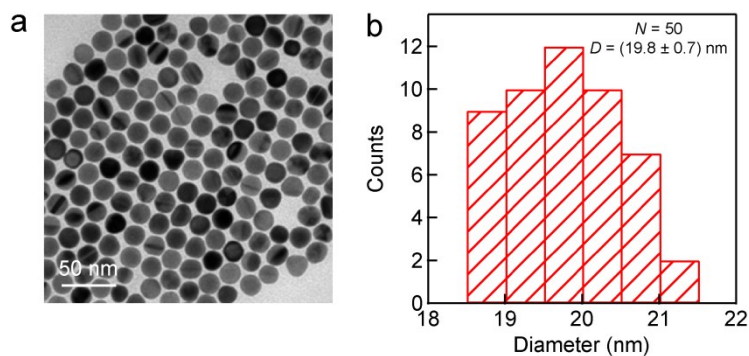

**Fig. S16** CTAB-capped 20-nm-sized Au nanospheres. (a) TEM image of the Au nanospheres. (b) Histogram of the diameter distribution of the Au nanospheres.

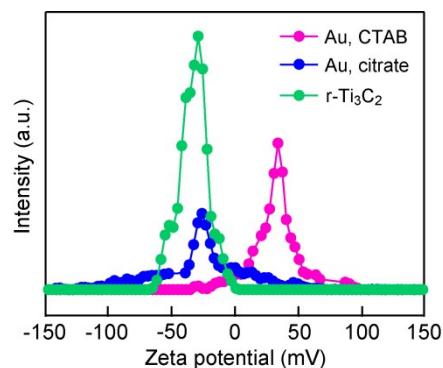

**Fig. S17** Zeta potential measurements. The Zeta potentials of the citrate-capped, CTAB-capped 20-nm-sized Au nanospheres and the r-Ti<sub>3</sub>C<sub>2</sub> sample dispersed in water.

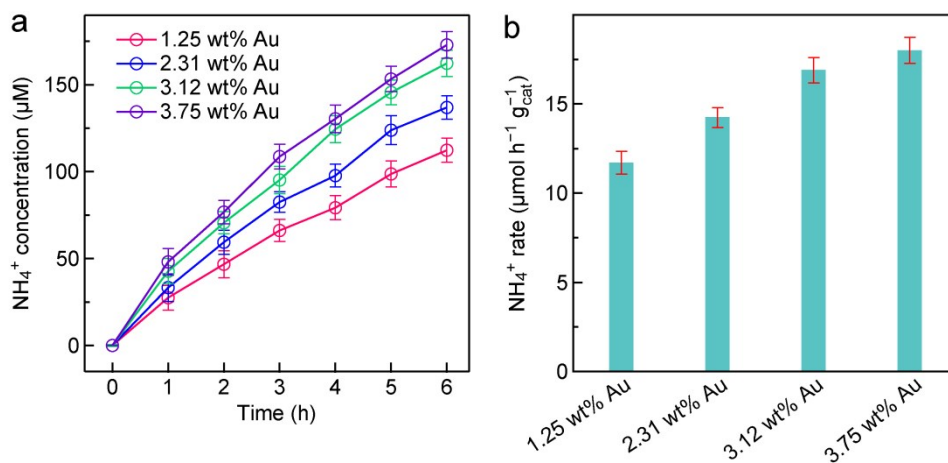

**Fig. S18** Photocatalytic  $\text{N}_2$  fixation over r-Ti<sub>3</sub>C<sub>2</sub>/edge-Au with different loaded Au amounts under white light illumination. (a) Time courses of the  $\text{NH}_3$  concentrations. (b)  $\text{NH}_3$  production rates.

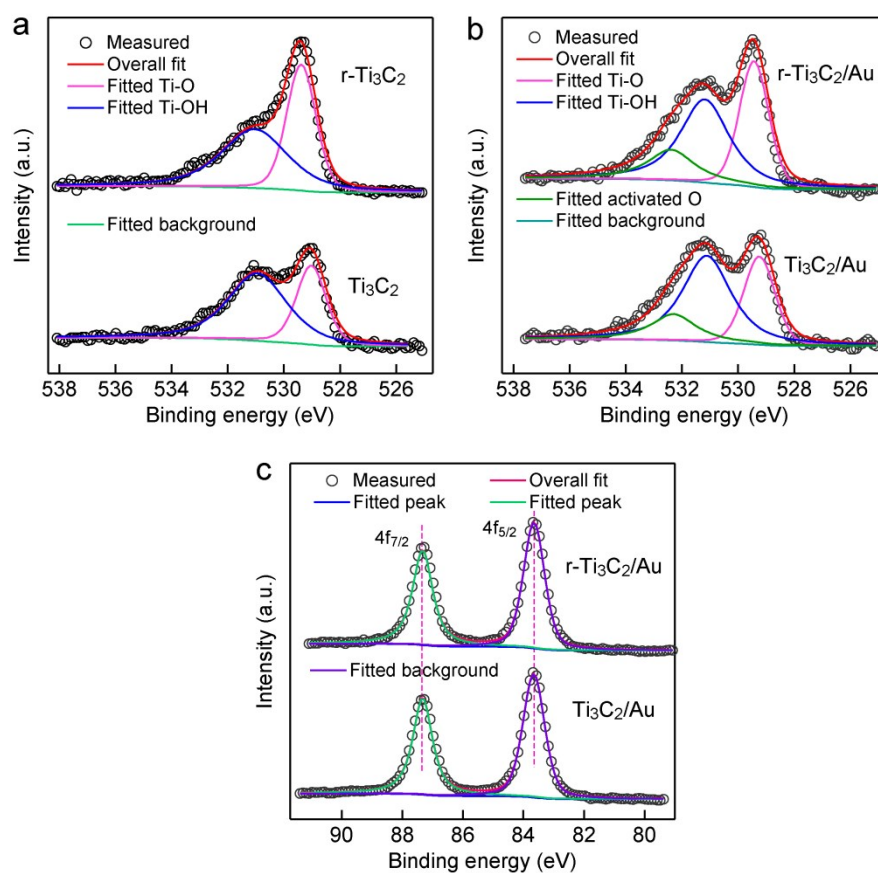

**Fig. S19** XPS analysis. (a) High-resolution O 1s spectra of the  $\text{Ti}_3\text{C}_2$  and  $\text{r-Ti}_3\text{C}_2$  samples. (b) High-resolution O 1s spectra of the  $\text{Ti}_3\text{C}_2/\text{Au}$  and  $\text{r-Ti}_3\text{C}_2/\text{Au}$  samples. (c) High-resolution Au 4f spectra of the  $\text{Ti}_3\text{C}_2/\text{Au}$  and  $\text{r-Ti}_3\text{C}_2/\text{Au}$  samples.

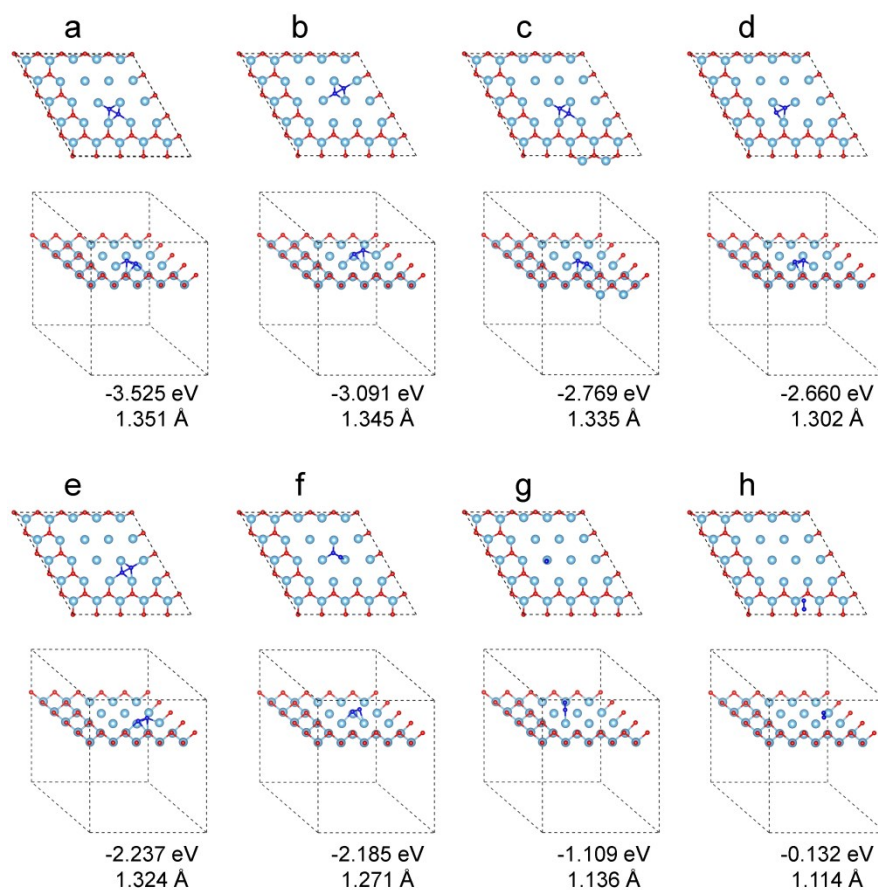

**Fig. S20** Configurations of a  $\text{N}_2$  molecule adsorbed at the different Ti sites on the surface of r- $\text{Ti}_3\text{C}_2$ . Light blue balls: Ti; red balls: O; dark blue balls: N. The top and bottom rows are the views along different angles.

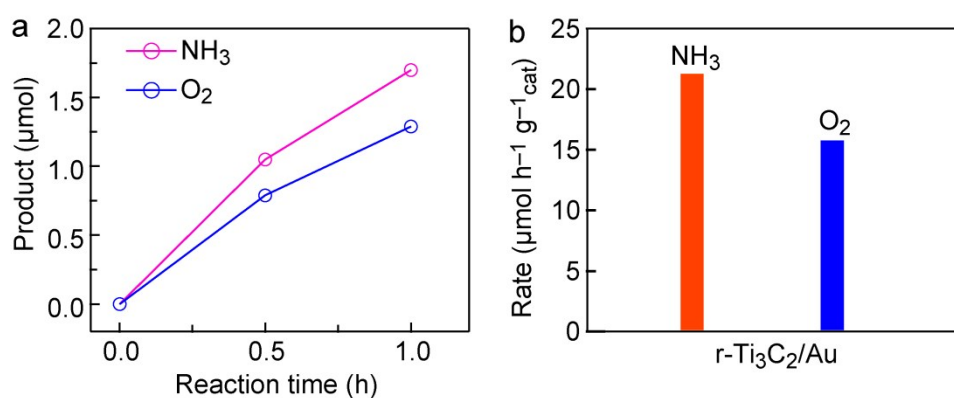

**Fig. S21**  $\text{N}_2$  photofixation reaction performed under AM 1.5G light illumination. (a) Amounts of  $\text{NH}_3$  and  $\text{O}_2$  formed in a sealed system. (b)  $\text{NH}_3$  and  $\text{O}_2$  production rates in the sealed system.

**Table S1** Ratios of the Ti atoms in the different valence states in Ti<sub>3</sub>C<sub>2</sub> and r-Ti<sub>3</sub>C<sub>2</sub> analyzed by XPS

| Sample                           | Ti valence state     |                      |                      |
|----------------------------------|----------------------|----------------------|----------------------|
|                                  | Ti <sup>2+</sup> (%) | Ti <sup>3+</sup> (%) | Ti <sup>4+</sup> (%) |
| Ti <sub>3</sub> C <sub>2</sub>   | 32.65                | 18.21                | 49.14                |
| r-Ti <sub>3</sub> C <sub>2</sub> | 40.86                | 36.18                | 22.96                |

**Table S2** Calculated AQEs for NH<sub>3</sub> generation at different wavelengths

| Wavelength<br>(nm) | NH <sub>3</sub> produced<br>(μmol h <sup>-1</sup> ) | Light power density<br>(mW cm <sup>-2</sup> ) | Light power<br>(mW) | AQE<br>(%) |
|--------------------|-----------------------------------------------------|-----------------------------------------------|---------------------|------------|
| 380                | 1.85                                                | 3.26                                          | 80.26               | 0.419      |
| 420                | 2.20                                                | 3.48                                          | 85.68               | 0.467      |
| 450                | 2.52                                                | 3.56                                          | 87.65               | 0.521      |
| 475                | 3.05                                                | 3.69                                          | 90.85               | 0.610      |
| 500                | 3.34                                                | 3.72                                          | 91.59               | 0.663      |
| 520                | 3.55                                                | 3.76                                          | 92.57               | 0.697      |
| 550                | 3.20                                                | 3.78                                          | 93.06               | 0.679      |
| 578                | 3.23                                                | 3.81                                          | 93.80               | 0.625      |
| 600                | 2.94                                                | 3.86                                          | 95.03               | 0.563      |
| 650                | 2.72                                                | 3.89                                          | 95.77               | 0.515      |
| 700                | 2.34                                                | 3.72                                          | 91.59               | 0.463      |

The reactor was illuminated with light from top. The projected area of the reactor in the direction of the light illumination was circular with a diameter of 5.6 cm. The illumination area,  $S$ , of the solution is therefore

$$S = \pi \times \left(\frac{d}{2}\right)^2 = \pi \times \left(\frac{5.6}{2}\right)^2 = 24.62 \text{ cm}^2 \quad (5)$$

Take the determination of the AQE at 520 nm as an example. The light power is

$$P = IS = 3.76 \times 24.62 = 92.57 \text{ mW} \quad (6)$$

The number of incident photons is

$$N_{\text{incident}} = \frac{Pt}{h\nu} = \frac{Pt\lambda}{hc} = \frac{92.57 \times 10^{-3} \times 3600 \times 550 \times 10^{-9}}{6.63 \times 10^{-34} \times 3 \times 10^8} = 9.21 \times 10^{20}$$

(7)

In the equation above,  $P$  is the light power,  $t$  is the illumination time (1 h = 3600 s),  $h$  is Planck's constant,  $\nu$  is the light frequency, and  $c$  is the speed of light in free space. The number of reacted electrons is

$$N_{\text{reacted}} = 3 \times \text{number of the generated NH}_3 \text{ molecules}$$

$$= 3 \times 3.55 \times 10^{-6} \times 6.02 \times 10^{23} = 6.42 \times 10^{18}$$

(8)

The AQE can then be calculated as

$$\text{AQE} = \frac{N_{\text{reacted}}}{N_{\text{incident}}} \times 100\% = \frac{6.42 \times 10^{18}}{9.21 \times 10^{20}} \times 100\% = 0.697\%$$

(9)

**Table S3** AQEs for N<sub>2</sub> photofixation in recent works

| Photocatalyst                                                                      | AQE                                 | Reference |
|------------------------------------------------------------------------------------|-------------------------------------|-----------|
| Au/hollow mesoporous C <sub>3</sub> N <sub>4</sub> spheres with NVs                | 0.64% at 550 nm                     | 6         |
| BiOBr with OVs                                                                     | 0.23% at 420 nm                     | 7         |
| AgInS <sub>2</sub> /Ti <sub>3</sub> C <sub>2</sub> Z-scheme heterojunction         | 0.07% at 420 nm                     | 8         |
| Cu-doped TiO <sub>2</sub>                                                          | 0.23% at 420 nm                     | 9         |
| WO <sub>3</sub> with OVs calcined at 600 °C                                        | 0.13% at 420 nm                     | 10        |
| Porous Cu <sub>9</sub> Fe <sub>4</sub>                                             | 0.13% at 535 nm                     | 11        |
| Nitrogen defective C <sub>3</sub> N <sub>4</sub> /BiO quantum dots                 | 0.53% at 400 nm                     | 12        |
| Ti <sub>3</sub> C <sub>2</sub> T <sub>x</sub> /TiO <sub>2</sub> calcined at 400 °C | 0.05% at 630 nm,<br>0.07% at 740 nm | 13        |
| Fe single atom/triphenylphosphine/NaI                                              | 0.05% at 490 nm                     | 14        |
| Bi <sub>2</sub> WO <sub>6</sub> with OVs                                           | 0.04% at 420 nm                     | 15        |
| MoO <sub>3-x</sub> nanosheets                                                      | 0.31% at 808 nm                     | 16        |
| F-doped TiO <sub>2</sub> with OVs                                                  | 0.38% at 420 nm                     | 17        |
| r-Ti <sub>3</sub> C <sub>2</sub> /Au                                               | 0.697% at 520 nm                    | this work |

AQE, apparent quantum efficiency; NVs, nitrogen vacancies; OVs, oxygen vacancies.

## References

- 1 M. Naguib, M. Kurtoglu, V. Presser, J. Lu, J. J. Niu, M. Heon, L. Hultman and Y. Gogotsi, *Adv. Mater.*, 2011, **23**, 4248.
- 2 X. H. Ji, X. N. Song, J. Li, Y. B. Bai, W. S. Yang and X. G. Peng, *J. Am. Chem. Soc.*, 2007, **129**, 13939.
- 3 Q. F. Ruan, L. Shao, Y. W. Shu, J. F. Wang and H. K. Wu, *Adv. Opt. Mater.*, 2014, **2**, 65.
- 4 Y. X. Zhao, R. Shi, X. A. Bian, C. Zhou, Y. F. Zhao, S. Zhang, F. Wu, G. I. N. Waterhouse, L. Z. Wu, C. H. Tung and T. R. Zhang, *Adv. Sci.*, 2019, **6**, 1802109.
- 5 S. Grimmw, J. Antony, S. Ehrlich and H. Krieg, *J. Chem. Phys.*, **2010**, *132*, 154104.
- 6 Y. Z. Guo, J. H. Yang, D. H. Wu, H. Y. Bai, Z. Yang, J. F. Wang and B. C. Yang, *J. Mater. Chem. A*, 2020, **8**, 16218.
- 7 X. L. Xue, R. P. Chen, H. W. Chen, Y. Hu, Q. Q. Ding, Z. Liu, L. B. Ma, G. Y. Zhu, W. J. Zhang, Q. Yu, J. Liu, J. Ma and Z. Jin, *Nano Lett.*, 2018, **18**, 7372.
- 8 J. Z. Qin, X. Hu, X. Y. Li, Z. F. Yin, B. J. Liu and K. Lam, *Nano Energy*, 2019, **61**, 27.
- 9 Y. X. Zhao, Y. F. Zhao, R. Shi, B. Wang, G. I. N. Waterhouse, L. Z. Wu, C. H. Tung and T. R. Zhang, *Adv. Mater.*, 2019, **31**, 1806482.
- 10 T. T. Hou, Y. Xiao, P. X. Cui, Y. N. Huang, X. P. Tan, X. S. Zheng, Y. Zou, C. X. Liu, W. K. Zhu, S. Q. Liang and L. B. Wang, *Adv. Energy Mater.*, 2019, **9**, 1902319.
- 11 T. T. Hou, L. L. Chen, Y. Xin, W. K. Zhu, C. Y. Zhang, W. H. Zhang, S. Q. Liang and L. B. Wang, *ACS Energy Lett.*, 2020, **5**, 2444.
- 12 C. Liang, H. Y. Niu, H. Guo, C. G. Niu, Y. Y. Yang, H. Y. Liu, W. W. Tang and H. P. Feng, *Chem. Eng. J.*, 2021, **406**, 12868.
- 13 T. T. Hou, Q. Li, Y. D. Zhang, W. K. Zhu, K. F. Yu, S. M. Wang, Q. Xu, S. Q. Liang and L. B. Wang, *Appl. Catal. B: Environ.*, 2020, **273**, 119072.
- 14 T. T. Hou, H. L. Peng, Y. Xin, S. M. Wang, W. K. Zhu, L. L. Chen, Y. Yao, W. H. Zhang, S. Q. Liang and L. B. Wang, *ACS Catal.*, 2020, **10**, 5502.
- 15 T. Y. Wang, C. T. Feng, J. Q. Liu, D. J. Wang, H. M. Hu, J. Hu, Z. Chen and G. L. Xue, *Chem. Eng. J.*, 2021, **414**, 128827.
- 16 H. Y. Wu, X. Li, Y. Cheng, Y. H. Xiao, R. F. Li, Q. P. Wu, H. Lin, J. Xu, G. Q. Wang, C. Lin, X. Y. Chen and Y. S. Wang, *J. Mater. Chem. A*, 2020, **8**, 2827.
- 17 R. Q. Guan, D. D. Wang, Y. J. Zhang, C. Liu, W. Xu, J. O. Wang, Z. Zhao, M. Feng, Q. K. Shang and Z. C. Sun, *Appl. Catal. B: Environ.*, 2021, **282**, 119580.
